# Supplementary material for: The role and electrochemical behavior of high-valence Mo cations doped in LiNi 0.8 Co 0.15 Al 0.05 O 2
Source: Royal Society of Chemistry journal article supplement (doi:10.1039/d5nr00380f), 2025-01-01
Supplement: d5nr00380f1.pdf [file d5nr00380f1.pdf]

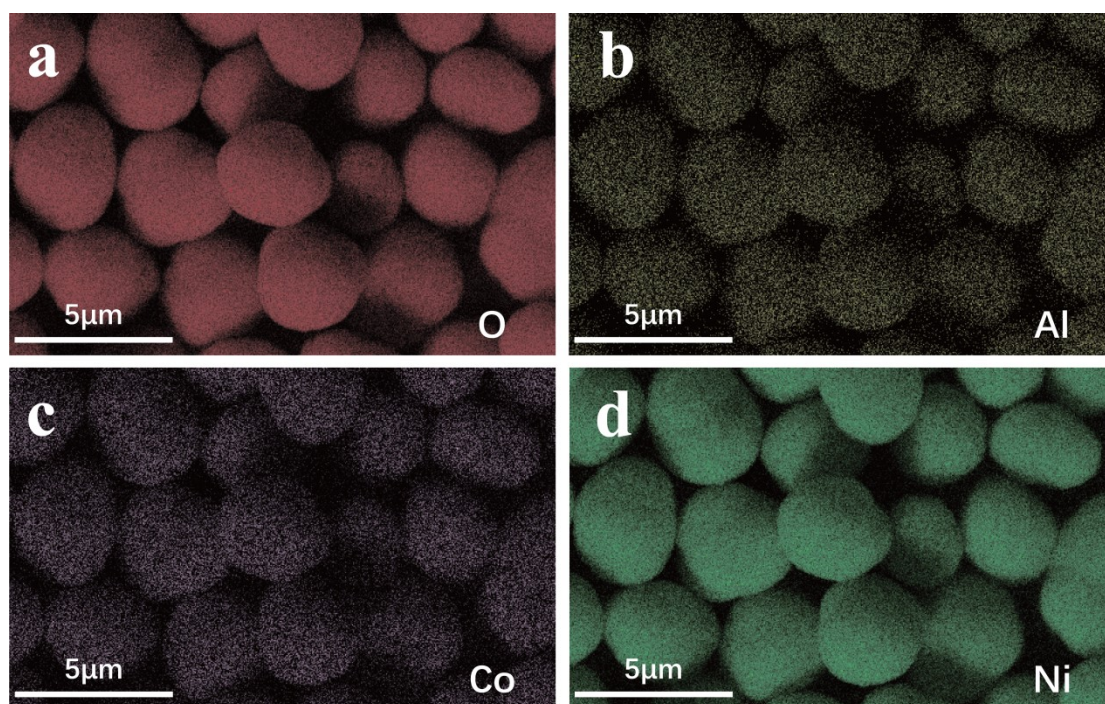

Figure S1. EDS mapping of O (a); Al (b); Co (c); Ni (d) of the  $\text{Ni}_{0.8}\text{Co}_{0.15}\text{Al}_{0.05}(\text{OH})_2$  commercial precursor.

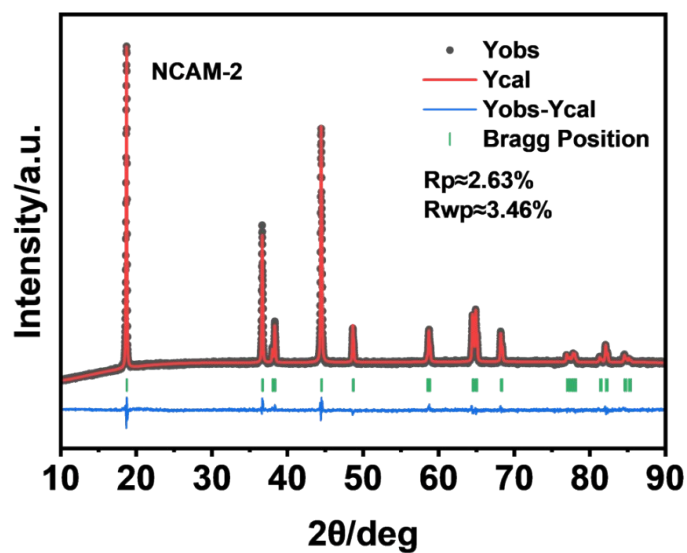

Figure S2. Refined XRD patterns of NCAM-2

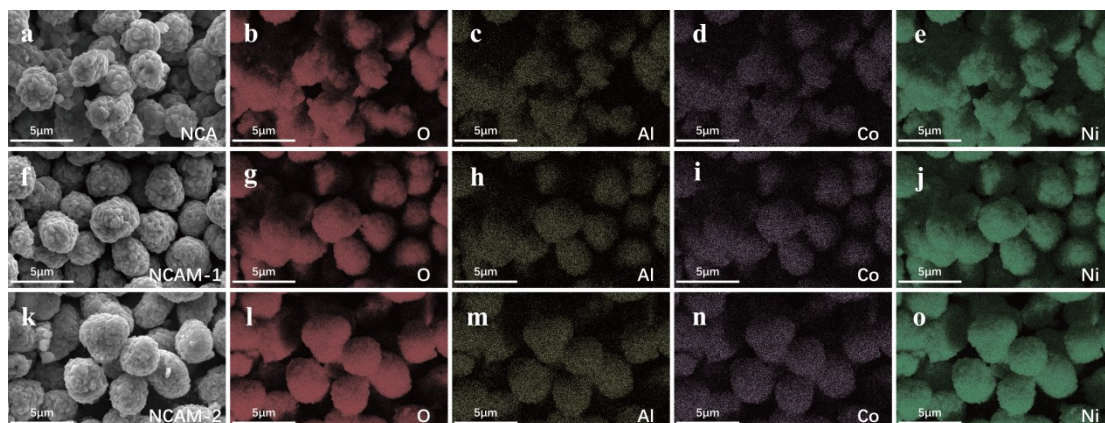

Figure S3. SEM images and EDS mapping of O, Al, Co, Ni of NCA (a-e), NCAM-1 (f-j) and NCAM-2 (k-o).

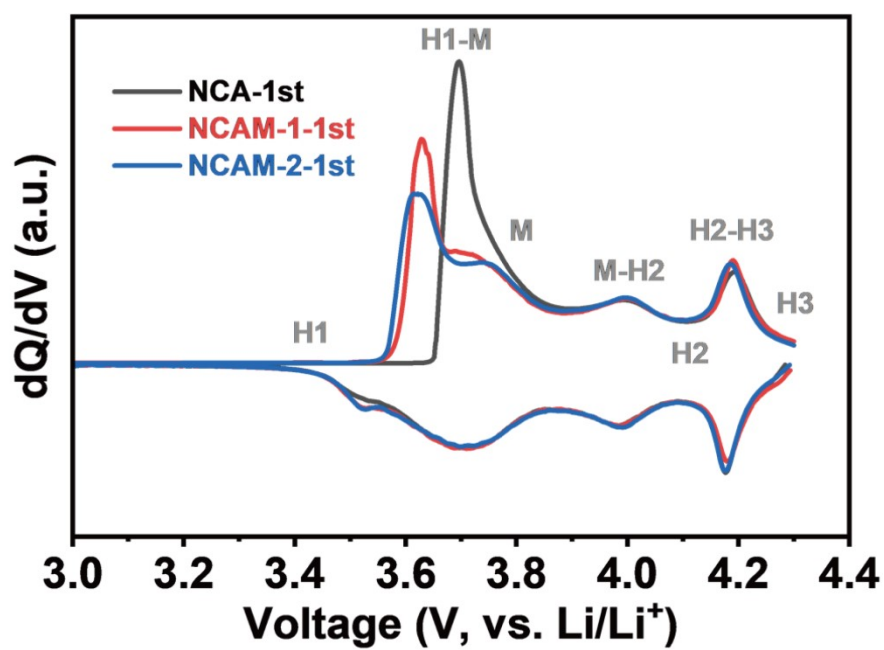

Figure S4. CV curves of NCA, NCAM-1 and NCAM-2 cathode materials, and their phase transitions.

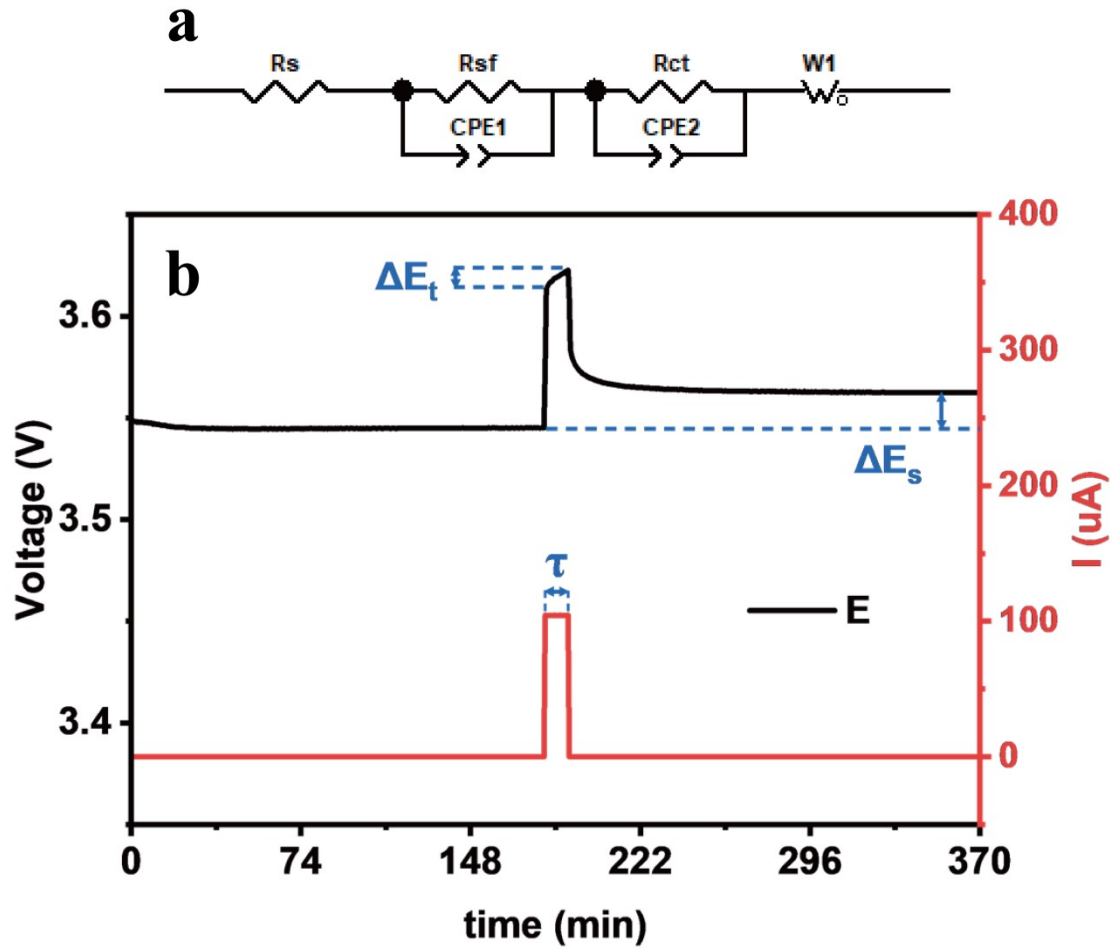

Figure S5. EIS equivalent fitting circuit (a); Single pulse of the GITT test (b).

The simplified formula of GITT are as follows:

$$D = \frac{4}{\pi\tau} \left( \frac{mV_M}{MS} \right)^2 \left( \frac{\Delta E_s}{\Delta E_t} \right)^2 \quad \left( \tau \ll \frac{L^2}{D} \right)$$

Figure S4b shows a single pulse of the GITT test, which  $\tau$  represents the duration of the current pulse (600 s),  $m$ ,  $V_M$  and  $M$  denotes the mass, the molar volume ( $202.3 \times 10^{-7} \text{ m}^3 \cdot \text{mol}^{-1}$ ) and the molar mass ( $97.61 \text{ g} \cdot \text{mol}^{-1}$ ) of the active material, respectively.  $S$  represents the electrode surface area ( $1.131 \times 10^{-4} \text{ m}^2$ ),  $\Delta E_s$  indicates the open-circuit potential difference before and after the current pulse, while  $\Delta E_t$  denotes the voltage variation during the current pulse.

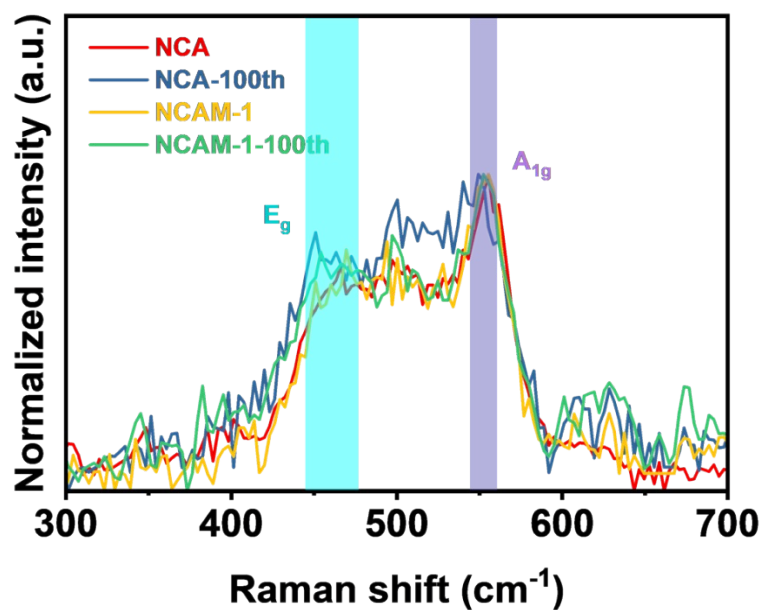

Figure S6. Raman spectra of NCA and NCAM-1 before and after 100 cycles of charge-discharge.

Table S1. Parameters of NCA, NCAM-1 and NCAM-2

| Sample | a=b(Å) | c(Å)    | c/a    | $I_{(003)}/I_{(104)}$ | Li <sup>+</sup> /Ni <sup>2+</sup> (%) |
|--------|--------|---------|--------|-----------------------|---------------------------------------|
| NCA    | 2.8685 | 14.1782 | 4.9427 | 1.20                  | 4.35                                  |
| NCAM-1 | 2.8691 | 14.1816 | 4.9429 | 1.60                  | 2.23                                  |
| NCAM-2 | 2.8693 | 14.1854 | 4.9439 | 1.36                  | 3.64                                  |

Table S2. The  $R_{sf}$  and  $R_{ct}$  of NCA and NCAM-1

|        | Cycle number | $R_{sf}(\Omega)$ | $R_{ct}(\Omega)$ |
|--------|--------------|------------------|------------------|
| NCA    | 1st          | 15.66            | 93.38            |
|        | 100th        | 50.17            | 707.8            |
| NCAM-1 | 1st          | 7.96             | 44.22            |
|        | 100th        | 8.73             | 158.5            |

Table S3. The mean  $D_{Li+}$  of NCA and NCAM-1

|        | Mean $D_{Li+}$ of charge ( $cm^2 s^{-1}$ ) | Mean $D_{Li+}$ of discharge( $cm^2 s^{-1}$ ) |
|--------|--------------------------------------------|----------------------------------------------|
| NCA    | 2.08062E-10                                | 2.74127E-10                                  |
| NCAM-1 | 3.10156E-10                                | 3.51085E-10                                  |
